## Right ventricular dysfunction by 3D echocardiography is the best predictor for death and re-hospitalization in patients with heart failure with reduced ejection fraction

S. Mihaila<sup>1</sup>, A. Velcea<sup>1</sup>, A. Andronic<sup>1</sup>, R.C. Rimbas<sup>1</sup>, A. Chitroceanu<sup>2</sup>, S.I. Calin<sup>1</sup>, D. Vinereanu<sup>1</sup>

<sup>1</sup>University of Medicine and Pharmacy Carol Davila, Bucharest, Romania; <sup>2</sup>University Emergency Hospital of Bucharest, Bucharest, Romania

**Funding Acknowledgement:** Type of funding source: None

**Background:** In patients with heart failure with reduced ejection fraction (HFrEF), right ventricular (RV) size and dysfunction by 2-dimensional echocardiography (2DE) were identified as risk factors for mortality and morbidity, but 3-dimensional echocardiography (3DE) enabled itself as a more reproducible and accurate method.

**Aim:** To assess the comparative prognostic value of parameters of RV size and dysfunction, measured by 2DE and 3DE, in patients with ischemic and non-ischemic HFrEF, on optimal clinical care, at long-term follow-up.

**Methods:** 142 consecutive patients (62±12 yrs, 104 males) with HFrEF, in sinus rhythm, were assessed by 2DE and 3DE, including RV full-volume acquisitions. RV diameter (RVd), RV end-systolic (RV\_EDA) and end-diastolic areas (RV\_ESA), RV fractional area change (RVFAC), and 2D\_TAPSE were measured by 2DE. RV end-diastolic (RV\_EDV) and end-systolic volumes (RV\_ESV), RV ejection fraction (RV\_EF), and 3D\_TAPSE were measured by a dedicated 3DE software. Patients were followed for 37±16 months after the index event. Primary outcome was cardiac death (CD). Secondary outcomes were: 1) HF hospitalizations (HFH); 2) a composite cardiac events (CE) end-point of CD or HFH, myocardial infarction, coronary revascularization, arrhythmias, or CRT.

**Results:** 38 CD, 47 HFH, and 62 CE occurred during follow-up. Mean RVd was 34±7 mm, RV\_EDA 20±11 cm<sup>2</sup>, RV\_ESA 12±5 cm<sup>2</sup>, RV\_FAC 37±13%, RV\_EDV 84±25 ml/m<sup>2</sup>, RV\_ESV 52±22 ml/m<sup>2</sup>, and RV\_EF 39±10%. Mean 2D\_TAPSE was 18±4 mm, while mean 3D\_TAPSE was 16±4 mm. By 2DE, only RV\_ESA and RV\_FAC, but not RV\_EDA or RVd, correlated with CD, HFH, and CE. 2D\_TAPSE correlated with HFH, but not with CD or CE, while 3D\_TAPSE correlated with all primary and secondary outcomes. By 3DE, RV\_ESV, but not RV\_EDV, correlated with CD, HFH, and CE. Moreover, 3D RV\_EF had better correlations with primary and secondary outcomes than 2D RV\_FAC (z=3.8, z=2.5, and z=2.5, all p<0.01). By multivariate linear regression analysis including RV\_ESA, RV\_FAC, RV\_ESV, RV\_EF, and 3D\_TAPSE, only RV\_EF was an independent predictor for CD and HFH (r<sup>2</sup>=0.68 and r<sup>2</sup>=0.30, both p<0.001).

**Conclusion:** In patients with ischemic and non-ischemic HFrEF, 3DE parameters of RV size and dysfunction are better predictors for death and re-hospitalization than 2DE parameters. The RV\_EF measured by 3DE was the best predictor for death in patients with HFrEF.

2DE vs. 3DE r correlations with outcomes

|                    | RV_ESA | RV_FAC_2D | TAPSE_2D | RV_ESV | RV_EF | TAPSE_3D | RV_FAC_3D |
|--------------------|--------|-----------|----------|--------|-------|----------|-----------|
| Cardiac death      | 0.30   | 0.25      | NS       | 0.40   | 0.62  | 0.35     | 0.55      |
| HF hospitalization | 0.29   | 0.33      | 0.25     | 0.35   | 0.57  | 0.33     | 0.45      |
| Cardiac events     | 0.25   | 0.25      | NS       | 0.34   | 0.50  | 0.35     | 0.48      |
